# Supplementary material for: New Generations of Tyrosine Kinase Inhibitors in Treating NSCLC with Oncogene Addiction: Strengths and Limitations
Source: MDPI journal article supplement (doi:10.3390/cancers15205079), 2023-10-20
Supplement: s1 [file s1]

# Supplementary Materials: New Generations of Tyrosine Kinase Inhibitors in Treating NSCLC with Oncogene Addiction: Strengths and Limitations

Ilaria Attili, Carla Corvaja, Gianluca Spitaleri, Ester Del Signore, Pamela Trillo Aliaga, Antonio Passaro and Filippo de Marinis

**Table S1.** 4<sup>th</sup> generation EGFR TKIs properties compared to those of osimertinib.

| Drug          | IC <sub>50</sub>                                                                                   | CNS Penetrant | Clinical trial                                                                           |
|---------------|----------------------------------------------------------------------------------------------------|---------------|------------------------------------------------------------------------------------------|
| Osimertinib   | EGFR 19Del/C797S = 304.39 nM<br>EGFR 19Del/T790M/C797S = 124.82 nM<br>EGFR L858R/C797S = 573.72 nM | Y             | FLAURA                                                                                   |
| EAI045        | EGFRC7697S = only when added cetuximab                                                             | -             | Withdrawn                                                                                |
| JBj-04-125-02 | EGFRL858R/T790M = 0.26 nmol/l                                                                      | -             | Withdrawn                                                                                |
| BLU-701       | EGFRex19del/C7697S = 0.5 nM<br>EGFRL858R/C797S = 1.5 nM                                            | Y             | None                                                                                     |
| BPI-361175    | No data available                                                                                  | Y             | Phase I/II trial<br>Post-3 <sup>rd</sup> TKI<br>NCT05393466                              |
| QLH11811      | EGFRex19del/T790M/C7697S = 2.6 nM<br>EGFRL858R/T790M/C797S = 2.6 nM                                | -             | Phase I trial<br>Either Tx naïve or post-TKIs<br>NCT05555212                             |
| BDTX-1535     | EGFRC797S < 10 nM                                                                                  | Y             | Phase I EGFR+ NSCLC*<br>or glioblastoma<br>NCT05256290                                   |
| BBT-207       | EGFRex19del/T790M/C7697S < 10 nM<br>EGFRL858R/T790M/C797S < 10 nM                                  | Y             | Phase I/II trial<br>Post-3 <sup>rd</sup> TKI<br>NCT05920135                              |
| JIN-A02       | EGFRex19del/T790M/C7697S = 4.7 nM<br>EGFRL858R/T790M/C797S = 12.8 nM                               | Y             | Phase I/II trial<br>Post TKI and CT<br>NCT05394831                                       |
| HS-10375      | No data available                                                                                  | -             | Phase I/II trial<br>Post-3 <sup>rd</sup> TKI<br>NCT05435248                              |
| TAS3351       | No data available                                                                                  | -             | Phase I/II trial<br>Post-3 <sup>rd</sup> TKI<br>NCT05765734                              |
| BLU-945       | EGFRex19del/C7697S = 0.5 nM<br>EGFRL858R/T790M/C797S = 0.5 nM                                      | -             | Phase Ib/II<br>Post-3 <sup>rd</sup> TKI<br>SYMPHONY<br>NCT04862780<br>(plus osimertinib) |
| BBT-176       | EGFR 19Del/C797S = 4.36 nM<br>EGFR 19Del/T790M/C797S = 1.79 nM<br>EGFR L858R/C797S = 5.35 nM       | -             | Phase I/II trial<br>Post-3 <sup>rd</sup> TKI<br>NCT04820023                              |
| H002          | EGFRex19del/T790M/C797S < 5 nM                                                                     | Y             | Phase I/II                                                                               |

|                              |                   |   |                                                            |
|------------------------------|-------------------|---|------------------------------------------------------------|
| EGFRL858R/T790M/C797S < 5 nM |                   |   | Post-3rd TKI<br>NCT05519293                                |
| WJ13404                      | No data available | - | Phase I/II<br><b>C797S+</b><br>Post-3rd TKI<br>NCT05662670 |

**Abbreviations:** IC50 = Half-maximal inhibitory concentration CNS = central nervous system; Y = yes; EGFR = Epidermal Growth Factor Receptor; NSCLC = Non-Small-Cell Lung Cancer; TKI(s) = Tyrosine Kinase Inhibitor(s); CT = chemotherapy. \*dose expansion catered for EGFR C797S+ NSCLC patients.

**Table S2.** Summary of EGFR Ex20ins TKi inhibitors.

| Drug                              | EGFRex20ins<br>IC <sub>50</sub> | Clinical trial                                                                | Results                                                               | Ongoing CTs                                                                                                                                                                                                                     |
|-----------------------------------|---------------------------------|-------------------------------------------------------------------------------|-----------------------------------------------------------------------|---------------------------------------------------------------------------------------------------------------------------------------------------------------------------------------------------------------------------------|
| Mobocertinib (TAK-788) 160 mg OD  | 4.3–22.5 nM                     | EXCLAIM<br>NCT02716116<br>Zhou 2022 <sup>1</sup>                              | ORR 28%<br>mPFS 7.3 months                                            | NCT02716116<br>(w or wout BM+)                                                                                                                                                                                                  |
| Poziotinib (HM781-36B) 16 mg OD   | 1.0 nM                          | ZENITH20<br>[NCT03318939]<br>Le 2020 <sup>2</sup>                             | ORR 14.8%<br>mPFS 4.2 months                                          | NCT03318939<br>8 mg BID                                                                                                                                                                                                         |
| TAS6417 (CLN-081) 100 mg BID      | 3–21 nM                         | NCT04036682<br>Yu 2022 <sup>3</sup>                                           | ORR 41%<br>mPFS 12 months                                             | NCT04036682<br>Ph II part<br>BM+ and prior TKIs                                                                                                                                                                                 |
| Sunvozertinib (DZD9008) 400 mg OD | 2.1 nM                          | WU-KONG1<br>[NCT03974022]<br>WU-KONG2 [CTR20192097]<br>Wang 2022 <sup>4</sup> | ORR 37.5%<br>mPFS NR (> 4 months)                                     | NCT05668988<br>Ph III S vs 1 <sup>st</sup> line CT                                                                                                                                                                              |
| Tuxobertinib (BDTX-189) 800 mg OD | 10–100 nM                       | Masterkey-01 NCT04209465                                                      | 5 pts EGFREx20ins<br>5 pts HER2Ex20ins                                | NCT04209465<br>Enrollment is ongoing in<br>non-fasting QD and BID co-<br>horts, and the low fat food<br>effect cohort                                                                                                           |
| Furmonertinib 160 mg or 240 mg OD | 11–81 nM                        | FAVOUR<br>NCT04858958<br>Han 2021 <sup>5</sup>                                | Pretreated<br>160 mg ORR 40%<br>240 mg ORR 50%<br>Tx naïve<br>ORR 80% | phase II trial NCT05466149<br><b>Phase III trial</b><br><b>FURMO-004</b><br>NCT to be determined<br>240 mg OD vs 160 mg OD<br>Vs CT<br><b>Phase Ib trial</b><br><b>FURMO-002</b><br>Dose escalation from 240 up<br>to 320 mg OD |

**Abbreviations:** CTs = clinical trials; OD = once daily; nM = nanomole; ORR = overall response rate; mPFS = median progression-free survival; NR = not reached; pts = patients; Tx naïve = treatment naïve; w= with; wout= without; BM = brain metastases; BID = two times a day; NCT National = Cancer Center trial ID.

**Table S3.** Summary of HER2ex20 ins TKIs.

| Drug                      | HER2ex20ins IC <sub>50</sub>                 | Clinical trial                                                         | Results                                | Ongoing CTs                                                                                                                                                                    |
|---------------------------|----------------------------------------------|------------------------------------------------------------------------|----------------------------------------|--------------------------------------------------------------------------------------------------------------------------------------------------------------------------------|
| Mobocertinib <sup>6</sup> | YVMA = 70nM<br>G776->VC= 10 nM<br>GSP= 10 nM | -                                                                      | -                                      | NCT02716116<br>Cohort 2 HER2Ex20ins<br>with no BM                                                                                                                              |
| Poziotinib (HM781-36B)    | 1.9 nM                                       | ZENITH20<br>[NCT03318939]<br>Le 2022 <sup>7</sup>                      | ORR 28%<br>mPFS 5.1 months             | NCT03318939<br>8 mg BID                                                                                                                                                        |
| Tarloxotinib              | 0.15-4.34 nM                                 | RAIN-701<br>Phase I/II trial<br>[NCT03805841]<br>Liu 2020 <sup>8</sup> | ORR 22%                                | RAIN-701<br>[NCT03805841]<br>Phase II part                                                                                                                                     |
| Pyrotinib                 | G776YVMA= 180<br>nM*                         | Phase II trial<br>NCT02834936<br>Zhou 2020 <sup>9</sup>                | ORR 30%<br>mPFS 6.9 months             | PEER20 trial<br>Phase II trial<br>(NCT04063462)<br>PYRAMID-1 trial<br>Phase III trial<br>(vs docetaxel)<br>(NCT04447118)<br>Phase II<br>(pyrotinib + PD1 abs)<br>(NCT04144569) |
| Tuxobertinib (BDTX-189)   | 13 nM <sup>^</sup>                           | Masterkey-01<br>NCT04209465                                            | 5 pts EGFREx20ins<br>5 pts HER2Ex20ins | NCT04209465<br>Enrollment is ongoing in<br>non-fasting QD and BID<br>cohorts, and the low fat<br>food effect cohort                                                            |
| TAS2940 <sup>10</sup>     | 1.54-3.28 nM                                 | -                                                                      | -                                      | NCT04982926<br>Phase I trial                                                                                                                                                   |

**Abbreviations:** CTs = clinical trials; OD = once daily; nM = nanomole; ORR = overall response rate; mPFS = median progression-free survival; NR = not reached; pts = patients; BM = brain metastases; BID = two times a day. \*refers to growth inhibition of patient-derived organoids and xenografts from a 42-year-old female with HER2-A775\_G776YVMA-inserted advanced lung adenocarcinoma.

**Table S4.** Ongoing clinical trials of RAS inhibitors.

| Trial                                 | Phase | Pt N | Drug                         | Disease                           | Key inclusion criteria                              | Location  |
|---------------------------------------|-------|------|------------------------------|-----------------------------------|-----------------------------------------------------|-----------|
| CODEBREAK-IGR<br>NCT05631249          | II    | 40   | Sotorasib                    | KRASG12C NSCLC                    | Post 1st line<br>No Prior KRAS-I                    | France    |
| SOLUCOM<br>NCT05311709                | II    | 100  | Sotorasib                    | KRASG12C NSCLC +<br>comorbidities | Post 1st line<br>60 pts ECOG PS2<br>No prior KRAS-I | Norway    |
| ECOG-ACRIN<br>LUNG-MAP<br>NCT04625647 | II    | 116  | Sotorasib                    | KRASG12C NSCLC                    | No prior KRAS-I                                     | USA       |
| Breakthrough<br>NCT05451056           | II    | 37   | Sotorasib                    | KRASG12C NSCLC                    | Post 1st line tx                                    | Korea     |
| LungKG12Ci<br>NCT05273047             | obs   | 300  | Sotorasib                    | KRASG12C NSCLC                    | Real world data                                     | France    |
| MERIT-lung<br>NCT05398094             | II    | 43   | Sotorasib                    | KRASG12C NSCLC                    | Stage III Ineligible for CRT                        | Spain     |
| KRYSTAL12<br>NCT04685135              | III   | 450  | Adagrasib<br>Vs<br>docetaxel | KRASG12C NSCLC                    | Post CT+ ICI<br>No prior RAS-I                      | Worldwide |
| ADEPPT<br>NCT05673187                 | II    | 68   | Adagrasib                    | KRASG12C NSCLC                    | Elderly<br>Post CT+/-ICI<br>No prior RAS-I          | Europe    |
| KRYSTAL 21                            | II    | 200  | Adagrasib                    | KRASG12C NSCLC                    | Post CT+/-ICI                                       | USA       |

|                                     |      |     |                           |                             |                                                                   |             |
|-------------------------------------|------|-----|---------------------------|-----------------------------|-------------------------------------------------------------------|-------------|
| NCT05853575                         |      |     | 600 vs 400 mg<br>BID      |                             | No prior RAS-I                                                    |             |
| NAUTIKA1<br>NCT04302025             | II   | 85  | Divarasilb                | gene addicted NSCLC         | Stage Ib-IIIb Neoadjuvant<br>setting<br>Biomarker-driven platform | USA         |
| KontRASt-01<br>NCT04699188          | I/II | 475 | JDQ433                    | KRASG12C solid tu-<br>mours | No prior RAS-I                                                    | Worldwide   |
| KontRASt-02<br>NCT05132075          | III  | 360 | JDQ433<br>Vs<br>docetaxel | KRASG12C NSCLC              | Post CT+ ICI<br>No prior RAS-I                                    | Worldwide   |
| STRIDER<br>NCT05999357              | II   | 42  | JDQ433                    | KRASG12C NSCLC              | BM+<br>No Prior RAS-I or at least<br>after 1 year of interval     | Nederland   |
| KontRASt-06<br>NCT05445843          | II   | 120 | JDQ433                    | KRASG12C NSCLC              | Tx naïve<br>PD-L1 neg or PD-L1<br>+/SKT11+                        | Worldwide   |
| Neoadjuvant Platform<br>NCT05714891 | II   | 27  | JDQ433                    | KRASG12C NSCLC              | Neoadjuvant setting<br>Stage IA2 to IIIA                          | Canada      |
| NCT04956640                         | I    | 400 | LY3537982                 | KRASG12C solid tu-<br>mours | Post CT +ICI                                                      | Worldwide   |
| NCT04973163                         | I    | 29  | BI 1823911                | KRASG12C solid tu-<br>mours | No prior RAS-I allowed                                            | USA, Europa |
| NCT05002270                         | I/II | 124 | Glecirasib<br>(JAB-21822) | KRASG12C solid tu-<br>mours | Dose exp CRC drug + ce-<br>tuximab                                | USA         |
| NCT05737706                         | I/II | 304 | MRTX1133                  | KRASG12D solid tu-<br>mours | Post standard tx                                                  | USA         |

**Abbreviations:** Pt N = patient number; obs = observational; vs = versus; BID = two times a day; NSCLC = non-small-cell lung cancer; KRAS-I(s) = KRAS inhibitors; ECOG PS = Eastern Cooperative Oncology Group Performance Status; Tx = treatment; CT = chemotherapy; ICI = immune-checkpoint inhibitor; PD-L1 = Programmed Cell Death Ligand 1; CRT = chemo-radiotherapy; BM = brain me-  
tastases.

**Table S5.** Ongoing clinical trials of RAF inhibitors.

| Trial                    | Phase | Pt N | Drug(s)                                                                         | Disease                                               | K Inclusion criteria                                                                                     | Location                                        |
|--------------------------|-------|------|---------------------------------------------------------------------------------|-------------------------------------------------------|----------------------------------------------------------------------------------------------------------|-------------------------------------------------|
| ENCO-BRAF<br>NCT04526782 | II    | 119  | Encorafenib +<br>Binimetinib                                                    | BRAFV600E                                             | Tx naïve or post CT+/-ICI<br>No prior BRAF/MEK-I                                                         | France                                          |
| OCEANII<br>NCT05195632   | II    | 55   | Encorafenib +<br>Binimetinib                                                    | BRAFV600E                                             | Tx naïve or post CT<br>No prior BRAF/MEK-I                                                               | China                                           |
| NCT05065398              | II    | 20   | HLX208<br>(BRAF-I)                                                              | BRAFV600E                                             | Post CT+/-ICI<br>No prior BRAF/MEK-I                                                                     | China, Taiwan                                   |
| NCT05900219              | II    | 75   | Vemurafenib+<br>HL-085<br>(MEK-I)                                               | BRAFV600E                                             | No prior BRAF/MEK-I                                                                                      | China                                           |
| RAMP202<br>NCT04620330   | II    | 100  | avutometinib (VS-6766)<br>(RAF/MEK clamp)<br>+<br>Dafactinib<br>(FAK inhibitor) | KRASG12V/other<br>BRAFV600E/other                     | Cht 1/2 KRASG12V<br>Cht 3 KRAS other<br>Cht 4 BRAFV600E<br>Cht 5BRAFOther<br>No prior<br>KRAS/BRAF/MEK-I | USA, Europe                                     |
| NCT04913285              | I     | 262  | Exarafenib (KIN-2787)<br>panRAF-I+/-<br>binimetinib                             | BRAF/NRAS+ solid tu-<br>mours and NSCLC/Mel-<br>anoma | Dose Exp<br>No prior BRAF/MEK-I                                                                          | USA, China, Taiwan,<br>Korea, Australia, Europe |
| NCT05786924              | I     | 140  | BDTX-4933 panRAF                                                                | BRAF/RAS/MAPK+<br>solid tumours                       | Dose Exp CHT1 NSCLC<br>BRAF class II or KRAS<br>NON G12C<br>CHT3 BRAF class I                            | USA                                             |
| NCT05668585              | I/II  | 122  | CFT1946<br>(RAF-I) +/-<br>Trametinib                                            | BRAFV600E solid tu-<br>mours                          | Prior or naïve RAF-I per-<br>mitted                                                                      | USA, France, Spain                              |
| ENHANCE<br>NCT05275374   | I/II  | 221  | XP-102<br>RAF-I) +/- Trametinib                                                 | BRAFV600E solid tu-<br>mours                          | Prior RAF/MEK-I permit-<br>ted                                                                           | China                                           |

|             |      |     |                                                                |                                                |                                                                                                             |                                  |
|-------------|------|-----|----------------------------------------------------------------|------------------------------------------------|-------------------------------------------------------------------------------------------------------------|----------------------------------|
| NCT05501912 | I    | 72  | ABM-1310<br>RAF-I                                              | BRAFV600E solid tu-<br>mours                   | Prior RAF/MEK-I permit-<br>ted                                                                              | China, Shanghai                  |
| NCT04190628 | I    | 112 | ABM-1310<br>RAF-I<br>Cobimetinib<br>MEK-I                      | BRAFV600E/ or other<br>solid tumours           | Prior RAF/MEK-I permit-<br>ted                                                                              | USA                              |
| NCT05355701 | I    | 174 | PF-07799933 (ARRY-440)<br>RAF-I-/+ binimetinib or<br>cetuximab | BRAF class II/III solid<br>tumours             | BRAF class II/III                                                                                           | USA, Canada, Israel              |
| NCT05538130 | I    | 124 | Encorafenib +<br>PF-07799544<br>MEK-I                          | BRAF V600E or class II<br>solid tumours        | BRAF V600E or class II                                                                                      | USA, Canada                      |
| NCT04985604 | I/II | 168 | Tovorafenib<br>PanRAF-I+<br>Pimasertib<br>MEK1-2-I             | MAPK Pathway Aberra-<br>tions<br>Solid tumours | Pts must have<br>BRAF fusion,<br>CRAF/RAF1 fusion, or<br>CRAF/RAF1 amplifica-<br>tion<br>No Prior RAF/MEK-I | USA, Australia, Europe,<br>Korea |
| NCT04892017 | I/II | 323 | DCC-3116+/-<br>Trametinib, bimetinib or<br>sotorasib           | MAPK Pathway Aberra-<br>tions<br>Solid tumours | RAS, NF1, or RAF muta-<br>tions<br>No Prior RAS/RAF/MEK-<br>I if discontinued due to<br>safety              | USA                              |
| NCT04800822 | I    | 196 | PF-07284892<br>SHP2-I +<br>binimetinib                         | BRAF class III solid tu-<br>mours              | A/B ALK/ROS1 lorlatinib<br>C/D CRC BRAF<br>E BRAF Solid tumours                                             | USA                              |

**Abbreviations:** Pt N = patient number; NSCLC = non-small-cell lung cancer; (B)RAF/MEK/KRAS/NF1-I(s) = KRAS inhibitors; ECOG PS = Eastern Cooperative Oncology Group Performance Status; Tx = treatment; CT = chemotherapy; ICI = immune-checkpoint inhibitor; Cht = cohort; Dose Exp = dose expansion. CFT1946 is an orally active and selective target ligand for BRAF kinase. CFT1946 is a degrader of mutant BRAFV600E, G469A, G466V and p61-BRAFV600E.

**Table S6.** Ongoing clinical trials of novel MET-inhibitors in MET dysregulated NSCLC or solid tumours.

| Trial                   | Phase | Pt N | Drug                                   | Disease                                 | Key inclusion criteria                                                                                                | Location                                                        |
|-------------------------|-------|------|----------------------------------------|-----------------------------------------|-----------------------------------------------------------------------------------------------------------------------|-----------------------------------------------------------------|
| SPARTA<br>NCT03175224   | I/II  | 344  | Bozitinib<br>(APL-101 or PLB1001)      | MET+ solid tumours or<br>NSCLC          | Solid tumors or NSCLC har-<br>bouring MET alterations<br>MET-I naïve or refractory                                    | Worldwide                                                       |
| KUNPENG<br>NCT04258033  | II    | 185  | Bozitinib<br>(APL-101 or PLB1001)      | MET+                                    | Must have c-Met dysregula-<br>tion adv NSCLC<br>Not mentioned Prior MET-Is<br>in the criteria                         | China                                                           |
| NCT04992858             | II    | 80   | Ningetinib                             | METex14 NSCLC                           | METex14 in 1x or tx<br>Prior therapies with MET-Is<br>are not allowed                                                 | China (not yet re-<br>cruiting)                                 |
| SHIELD-1<br>NCT03993873 | I/II  | 180  | TPX-0022<br>(elzovantinib)             | MET+ NSCLC, gastric or<br>solid tumours | METex14 or MET AMP<br>No restrictions on prior MET-<br>Is                                                             | USA, Korea, France,<br>Spain<br><b>Enrollment<br/>completed</b> |
| NCT04270591             | I/II  | 183  | Glumetinib (SCC244)                    | MET+/METex14 NSCLC                      | Cohort 1 (China):<br>MET OE, MET AMP,<br>METex14<br>Cohort 2 (USA) METex14<br>Only in phase I Prior MET-Is<br>allowed | China, Usa                                                      |
| NCT02929290             | Ib    | 80   | BPI-9016M, a dual<br>MET/Axl inhibitor | METex14 or MET OE<br>NSCLC              | MET OE or METex14<br>Adv NSCLC<br>Prior type I MET-Is are al-<br>lowed                                                | China                                                           |
| NCT04052971             | I/II  | 78   | ABN401 (selective<br>MET-I)            | MET+ NSCLC or solid<br>tumours          | Phase I MET+<br>Phase II METex14                                                                                      | Korea, Australia                                                |

|             |   |    |                        |                    |                                                                    |                      |
|-------------|---|----|------------------------|--------------------|--------------------------------------------------------------------|----------------------|
|             |   |    |                        |                    | Only in phase I Prior MET-Is allowed                               |                      |
| NCT05752552 | I | 15 | DO-2 (selective MET-I) | MET+ solid tumours | MET mut or MET AMP (≥10 copies)<br>No restrictions on prior MET-Is | Belgium, Netherlands |

**Abbreviations** = pt N = patient number; lx = liquid biopsy; tx = tissue biopsy; MET OE = MET over-expression; METex14 = MET exon 14 skipping mutations; MET AMP = MET amplification; MET-I(s) = MET inhibitor(s); NSCLC = Non-small-cell lung cancer. .

**Table S7.** Ongoing clinical trials of novel ALK TKIs.

| Trial                   | Phase | Pt N | Drug                                         | Disease                        | Key inclusion criteria                                                   | Location                                                                         |
|-------------------------|-------|------|----------------------------------------------|--------------------------------|--------------------------------------------------------------------------|----------------------------------------------------------------------------------|
| NCT03607188             | I     | 18   | Alkotinib<br>(2nd ALK-I)                     | ALK+ NSCLC                     | Post-crizotinib                                                          | Shanghai                                                                         |
| NCT04211922             | II    | 104  | Alkotinib<br>2nd ALK-I                       | ALK+ NSCLC                     | Post-crizotinib                                                          | Shanghai                                                                         |
| NCT05441956             | I     | 100  | TGRX-326<br>(3rd ALK-I)                      | ALK+ or ROS1+<br>NSCLC         | Post 1 <sup>st</sup> / 2 <sup>nd</sup> ALK-I                             | China                                                                            |
| NCT04237805             | I/II  | 280  | Foritinib<br>(SAF-189s)<br>(3rd ALK-I/ROS-1) | ALK+ NSCLC                     | Tx naïve and Refractory                                                  | Shanghai                                                                         |
| NCT05257512             | I/II  | 70   | SY-3505<br>(3rd ALK-I)                       | ALK+ NSCLC                     | Refractory                                                               | China                                                                            |
| NCT05055232             | I     | 120  | XZP-3621<br>(3rd ALK-I)                      | ALK+ NSCLC                     | Naïve/refractory                                                         | China                                                                            |
| NCT05482087             | II    | 190  | XZP-3621<br>(3rd ALK-I)                      | ALK+/ROS1+ NSCLC               | Naïve/refractory                                                         | China                                                                            |
| NCT05204628             | RPIII | 238  | XZP-3621<br>Vs<br>crizotinib                 | ALK+ NSCLC                     | Tx Naïve                                                                 | China                                                                            |
| NCT03917043             | I     | 150  | APG-2449<br>FAK/ALK/ROS1 I                   | Solid tumours                  | Expansion phase<br>Tx naïve or pretreated ALK or<br>ROS1+ NSCLC          | China                                                                            |
| NCT04849273             | I     | 11   | TPX-0131<br>4th ALK-I                        | ALK+ NSCLC or solid<br>tumours | Pretreated with up 3 ALK-Is                                              | USA, Korea, Australia<br>Terminated (Adverse<br>change in the risk/ben-<br>efit) |
| ALKOVE-1<br>NCT05384626 | I/II  | 214  | NVL-655<br>4 <sup>th</sup> ALK-I             | ALK+ NSCLC or solid<br>tumours | Expansion Phase<br>Cohorts 2 A-C NSCLC<br>Cohorts 2D other solid tumours | USA, Europe                                                                      |

**Abbreviations:** Pt N = patient number; ALK = Anaplastic Lymphoma Kinase; ALK-I(s) = ALK inhibitor(s); Tx = treatment; NSCLC = Non-small-cell-lung cancer.

**Table S8.** Ongoing clinical trials of novel ROS1 TKIs.

| Trial                    | Phase | Pt N | Drug                            | Disease                             | Key inclusion criteria                                      | Location  |
|--------------------------|-------|------|---------------------------------|-------------------------------------|-------------------------------------------------------------|-----------|
| NCT04603807              | III   | 220  | Crizotinib<br>Vs<br>entrectinib | ROS1+ NSCLC                         | Tx naïve<br>With or without BM                              | Worldwide |
| BEAST<br>NCT03178552     | II    | 1000 | entrectinib                     | ROS1+ NSCLC                         | Tx naïve<br>ctDNA+ for ROS1+                                | Worldwide |
| NCT05170204              | III   | 320  | Entrectinib<br>Vs durvalumab    | ROS1+NSCLC                          | Stage III NSCLC<br>A1 ALK+ Alectinib<br>A2 ROS1+<br>A3 RET+ | Worldwide |
| TRIDENT-1<br>NCT03093116 | I/II  | 500  | repotrectinib                   | ALK, ROS1, or NTRK<br>solid tumours | EXP-1: ROS1 TKI-naïve ROS1+<br>NSCLC                        | Worldwide |

|                         |      |     |                                  |                              |                                                                                                                                                                                                                                                                     |           |
|-------------------------|------|-----|----------------------------------|------------------------------|---------------------------------------------------------------------------------------------------------------------------------------------------------------------------------------------------------------------------------------------------------------------|-----------|
|                         |      |     |                                  |                              | EXP-2: 1 Prior ROS1 TKI and 1 Platinum based CT ROS1+ NSCLC<br>EXP-3: 2 Prior ROS1 TKIs ROS1+ NSCLC (No CT or ICI)<br>EXP-4: 1 Prior ROS1 TKI ROS1+ NSCLC (No CT or ICI)<br>EXP-5: TRK TKI-naïve NTRK+ solid tumors<br>EXP-6: TRK TKI-pretreated NTRK+ solid tumors |           |
| NCT04395677             | II   | 106 | taletrectinib                    | ROS1+ NSCLC                  | ROS1-I naïve or post-crizotinib                                                                                                                                                                                                                                     | China     |
| TRUST II<br>NCT04919811 | II   | 154 | taletrectinib                    | ROS1+ NSCLC                  | TKI tx naïve or treated with prior ROS1-Is                                                                                                                                                                                                                          | Worldwide |
| ARROS-1<br>NCT05118789  | I/II | 359 | NVL-520                          | ROS1+ solid tumours or NSCLC | 2a: ROS1 naïve/ up 1L CT<br>2b: 1L ROS1-I/ CT naïve<br>2c: 1L ROS1-I/ 1L CT<br>2d: ≥2L ROS-Is/1L CT<br>2e: solid tumours                                                                                                                                            | Worldwide |
| NCT05765877             | II   | 26  | Iruplinalkib<br>WX-0593          | ALK or ROS1+ NSCLC           | Stage IB-IIIa                                                                                                                                                                                                                                                       | China     |
| NCT05351320             | II   | 40  | Iruplinalkib<br>WX-0593 plus CRT | ALK or ROS1+ NSCLC           | Stage III                                                                                                                                                                                                                                                           | China     |
| NCT04197076             | II   | 200 | TKIs                             | NSCLC                        | IIB-IIIb stage<br>A: PD-L1 ≥ 50% ICI<br>B: EGFR/ALK or ROS1+<br>C: non-gene addicted                                                                                                                                                                                | China     |
| NCT03607188             | I    | 18  | Alkotinib                        | ALK or ROS1+ NSCLC           | Pretreated with CT or crizotinib                                                                                                                                                                                                                                    | China     |
| NCT05441956             | I    | 100 | TGRX-326                         | ALK+ or ROS1+ NSCLC          | Post 1st/ 2nd TKIs                                                                                                                                                                                                                                                  | China     |
| NCT04237805             | I/II | 280 | Fortinib<br>(SAF-189s)           | ALK+ or ROS1+ NSCLC          | Tx naïve and Refractory                                                                                                                                                                                                                                             | Shanghai  |
| NCT04996121             | I/II | 360 | XZP-5955                         | NTRK+ or ROS1+ solid tumours | Dose exp<br>NTRK solid tumours<br>Tx naïve or post crizotinib<br>ROS1+ NSCLC                                                                                                                                                                                        | China     |
| NCT03917043             | I    | 150 | APG-2449<br>FAK/ALK/ROS1 I       | Solid tumours                | Expansion phase<br>Tx naïve or pretreated ALK or ROS1+ NSCLC                                                                                                                                                                                                        | China     |
| ALBATROS<br>NCT04621188 | II   | 84  | lorlatinib                       | ROS1+ NSCLC                  | Post-crizotinib or entrectinib<br>Post-CT                                                                                                                                                                                                                           | France    |
| NCT03612154             | II   | 35  | lorlatinib                       | ROS1+ NSCLC                  | Tx naïve or post CT<br><b>No prior ROS1-I</b>                                                                                                                                                                                                                       | Korea     |
| NCT01639508             | II   | 86  | cabozantinib                     | ROS1+ NSCLC                  | Group A RET+<br>Group B NTRK, AXL or MET<br>Group C ROS1<br>Group D RET+ prior RET-I                                                                                                                                                                                | USA       |

**Abbreviations:** Pt N= patient number; ROS1 = c-ros oncogene 1; ROS1-I(s) = ROS1 inhibitors ; Tx = treatment; NSCLC = Non-small-cell-lung cancer; BM = brain metastases; TKI(s) = tyrosine kinase inhibitor(s); TX = treatment; EXP = expansion; CT= chemotherapy; ICI = immuncheckpoint inhibitor.

**Table S9.** Ongoing clinical trials of novel NTRK-inhibitors.

| Trial                       | Phase | Pt N | Drug          | Disease                          | Key inclusion criteria                                                                                                                                                                                                                                                                                                                              | Location  |
|-----------------------------|-------|------|---------------|----------------------------------|-----------------------------------------------------------------------------------------------------------------------------------------------------------------------------------------------------------------------------------------------------------------------------------------------------------------------------------------------------|-----------|
| NAVIGATE<br>NCT02576431     | II    | 204  | Larotrectinib | NTRK+ solid tumours              | 1: NSCLC<br>2: thyroid carcinoma<br>3: soft-tissue sarcoma<br>4: colorectal cancer<br>5 Salivary tumours<br>6: biliary tumours<br>7: Primary CNS<br>8: other solid tumours<br>9: solid tumours without confirmed NTRK gene fusions<br>10: melanoma/non secretory breast cancer/colorectal cancer<br>11: all tumour types without measurable disease | Worldwide |
| NCT05192642                 | Obs.  | 368  | larotrectinib | NTRK solid tumours               | Real world data of larotrectinib outside clinical trials                                                                                                                                                                                                                                                                                            | USA       |
| LAROTRACKING<br>NCT04814667 | Obs   | 27   | larotrectinib | NTRK solid tumours               | Real world data of larotrectinib                                                                                                                                                                                                                                                                                                                    | France    |
| ON-TRK<br>NCT04142437       | Obs   | 300  | larotrectinib | NTRK solid tumours               | Real world data of larotrectinib                                                                                                                                                                                                                                                                                                                    | worldwide |
| NCT04945330                 | Obs   | 100  | larotrectinib | NTRK solid tumours               | Real world data of larotrectinib                                                                                                                                                                                                                                                                                                                    | Japan     |
| NCT04879121                 | II    | 13   | larotrectinib | NTRK AMP solid tumours           | NTRK amplified<br>No prior treated with NTRK-Is                                                                                                                                                                                                                                                                                                     | USA       |
| TRUMP<br>NCT03574402        | II    | 400  | ensartinib    | ROS1+ or NTRK+ NSCLC             | Tx naïve<br>Arm 5 ROS1+<br>Arm 6 NTRK+                                                                                                                                                                                                                                                                                                              | China     |
| TRIDENT-1<br>NCT03093116    | I/II  | 500  | repotrectinib | ALK, ROS1, or NTRK solid tumours | EXP-1: ROS1 TKI-naïve ROS1+ NSCLC<br>EXP-2: 1 Prior ROS1 TKI and 1 Platinum based CT ROS1+ NSCLC<br>EXP-3: 2 Prior ROS1 TKIs ROS1+ NSCLC (No CT or ICI)<br>EXP-4: 1 Prior ROS1 TKI ROS1+ NSCLC (No CT or ICI)<br>EXP-5: TRK TKI-naïve <b>NTRK+ solid tumors</b><br>EXP-6: TRK TKI-pretreated NTRK+ solid tumors                                     | Worldwide |
| NCT03556228                 | I     | 74   | VMD-928       | NTRK1+ solid tumours or lymphoma | NTRK1+ solid tumours or lymphoma progressing on larotrectinib or entrectinib                                                                                                                                                                                                                                                                        | USA       |
| NCT04996121                 | I/II  | 360  | XZP-5955      | NTRK+ or ROS1+ solid tumours     | Dose exp<br>NTRK solid tumours<br>Tx naïve or post crizotinib<br>ROS1+ NSCLC                                                                                                                                                                                                                                                                        | China     |

**Abbreviations:** Pt N= patient number; ROS1 = c-ros oncogene 1; NTRK = Neurotrophic tyrosine receptor kinase; NTRK-I(s)= NTRK inhibitor(s); ROS1-I(s) = ROS1 inhibitors ; Tx = treatment; NSCLC = Non-small-cell-lung cancer; BM = brain metastases; TKI(s) = tyrosine kinase inhibitor(s); TX = treatment; EXP = expansion; CT= chemotherapy; ICI = immuncheckpoint inhibitor.



**Table S10.** Ongoing clinical trials of novel RET TKIs.

| Trial                       | Phase | Pt N | Drug                              | Disease                       | Key inclusion criteria                                                                | Location   |
|-----------------------------|-------|------|-----------------------------------|-------------------------------|---------------------------------------------------------------------------------------|------------|
| LIBRETTO-001<br>NCT03157128 | I/II  | 875  | Selpercatinib                     | RET+ solid tumours            | Tx naïve or pretreated RET+ solid tumours<br><b>Multitargeted inh allowed</b>         | Worldwide  |
| LIBRETTO-432<br>NCT04819100 | III   | 170  | Selpercatinib after surgery or RT | RET+ NSCLC                    | IB-III A RET Fusion-Positive NSCLC<br>Following definitive locoregional tx            | Worldwide  |
| LIBRETTO-431<br>NCT04194944 | III   | 250  | Selpercatinib<br>Vs<br>CT +/-ICI  | RET+NSCLC                     | Tx naïve<br>RET fusion+ on tissue or lx                                               | Worldwide  |
| NCT05170204                 | III   | 320  | Pralsetinib<br>Vs<br>durvalumab   | Stage III NSCLC               | Stage III NSCLC<br>After CRT<br>Cohort A3 RET+                                        | Worldwide  |
| acceleRET<br>NCT04222972    | III   | 226  | Pralsetinib<br>Vs<br>CT           | RET+ NSCLC                    | <b>Tx naïve<br/>RET fusion+ on tissue</b>                                             | worldwide  |
| NCT01639508                 | II    | 86   | cabozantinib                      | RET+, ROS1+ or<br>NTRK+ NSCLC | <b>A: RET+<br/>B: NTRK+, MET+ or AXL+<br/>C ROS1+<br/>D RET+ prior treated RET-Is</b> | USA        |
| NCT05117658                 | II    | 83   | HA121-28                          | RET+ NSCLC                    | After at least one CT line<br><b>No prior RET-Is</b>                                  | China      |
| MARGARET<br>NCT04683250     | I/II  | 202  | TAS0953/HM06                      | RET+ solid tumours            | RET+ solid tumours<br>Progressing on standard tx<br><b>Prior RET-Is allowed</b>       | USA, Japan |
| NCT05278364                 | I/II  | 184  | SY-5007                           | RET+ solid tumours            | RET+ solid tumours<br>Progressing on standard tx<br><b>No prior RET-Is</b>            | China      |
| NCT06031558                 | III   | 120  | SY-5007                           | RET+ NSCLC                    | Tx naïve<br>RET fusion on tx or lx                                                    | Shanghai   |
| NCT05675605                 | I/II  | 248  | TY-1091                           | RET+ solid tumours            | RET fusions solid tumours                                                             | China      |
| NCT05451602                 | I/II  | 456  | HEC169096                         | RET+ solid tumours            | RET fusions solid tumours<br>No restrictions on prior tx lines                        | China      |

**Abbreviations:** Pt N= patient number; lx = liquid biopsy; inh = inhibitor; RET = rearranged during transfection; ROS1 = c-ros oncogene 1; NTRK = Neurotrophic tyrosine receptor kinase; RET-(S) = RET inhibitors; NTRK-I(s)= NTRK inhibitor(s); ROS1-I(s) = ROS1 inhibitors ; Tx = treatment; NSCLC = Non-small-cell-lung cancer; BM = brain metastases; TKI(s) = tyrosine kinase inhibitor(s); TX = treatment; EXP = expansion; CT= chemotherapy; ICI = immuncheckpoint inhibitor.

**Surufatinib** inhibits VEGFR1/2/3, FGFR1, and CSF-1R; **Sarilumab** is an IL6-receptor Antibody; **Dalpiciclib** (CDK4/6 inhibitor) already approved in China for breast cancer; **pelcitoclax (APG-1252)** is an anti-Bcl2; **pamiparib** is an investigational Poly (ADP-ribose) polymerase (PARP) inhibitor recently approved in China for the treatment of germline BRCA mutation-associated recurrent advanced ovarian, fallopian tube or primary peritoneal cancer previously treated with two or more lines of chemotherapy; **VIC-1911** is an Aurora A inhibitor; **Minnelide** is an oral anti-super-enhancer drug that inhibits MYC expression; **Telaglenastat** (CB-839) (glutaminase inhibitor) **envafolimab** is anti-PDL1 agent; LP300 is a TRX and GRX inhibitor; **patritumumab-deruxtecan** a new ADC anti-HER3 conjugated to deruxtecan; **Quaratusugene ozeplasmid** consists of non-viral lipid nanoparticles that encapsulate a DNA plasmid with the TUSC2 tumor suppressor gene; **PM8002** is a bifunctional antibody antiPDL1/VEGF

**Table S11.** Ongoing trials of TKI-based combinations in *EGFR* or *HER2* Exon 20 insertions.

| Trial                    | Phase | Pt N | Drugs                                                        | Disease                                       | Key inclusion criteria                                                                                                              | Location                   |
|--------------------------|-------|------|--------------------------------------------------------------|-----------------------------------------------|-------------------------------------------------------------------------------------------------------------------------------------|----------------------------|
| CONCERTO<br>NCT05241873  | I/II  | 322  | BLU-451+/-CT                                                 | EGFREx20ins                                   | Several CTs<br>All EGFREx20ins<br>A CT ami or mobo<br>B Post CT<br>C BM<br>D prior CT Ami<br>and mobo<br>E Tx naive<br>F/G Uncommon | USA/Canada/Japan<br>Taiwan |
| NCT04974879              | II    | 20   | Osimertinib<br>+<br>bevacizumab                              | EGFREx20ins                                   | Not indicated prior<br>Tx                                                                                                           | China                      |
| NCT05132777              | II    | 155  | Osimertinib<br>+<br>JMT101<br>(ab antiEGFR)                  | EGFREx20ins                                   | after CT                                                                                                                            | Shanghai                   |
| NCT05751187              | II    | 54   | Pembrolizumab<br>Plus<br>Bevacizumab<br>Plus CT              | EGFREx20ins                                   | Tx naive                                                                                                                            | Shanghai                   |
| NCT04144569              | II    | 30   | Pyrotinib + PD1                                              | HER2Ex20ins                                   | Post-CT                                                                                                                             | China                      |
| NCT05745740              | I/II  | 26   | Pyrotinib +<br>Disitamab Vedotin<br>(RC48-ADC)               | HER2Ex20ins                                   | Post-CT and ICI                                                                                                                     | Shanghai                   |
| NCT05016544              | I/II  | 48   | Pyrotinib + inetetamab<br>(anti-HER2)                        | HER2 mut or AMP                               | Post-CT<br>No prior HER2-Is                                                                                                         | China                      |
| NCT05482568              | I/II  | 324  | Pyrotinib +<br>SHR-A1811+<br>SHR-1316<br>Anti-PDL1           | HER2                                          | Post CT<br>Not specified HER2<br>alterations needed                                                                                 | China                      |
| NCT05847764              | II    | 95   | Disitamab Vedotin +<br>Furmonertinib or<br>CT                | HER2 alterations                              | Arm 1/2 HER2 al-<br>terations w or wout<br>EGFR+ tx naïve<br>Arm 3 pretreated<br>HER2 mutated                                       | China                      |
| NCT04324125              | Obs   | 70   | CT+/-ICI                                                     | HER2ins or AMP                                | Tx naive                                                                                                                            | China                      |
| NCT05681780              | I/II  | 20   | TILs +Nivolumab+<br>CTX+IL2                                  | EGFR, ALK, ROS1,<br>or ERBB2 altera-<br>tions | Post CT                                                                                                                             | USA<br>Florida             |
| NCT04042701              | Ib    | 115  | T dxt +<br>pembro                                            | HER2 OE or mu-<br>tated NSCLC or<br>Breast    | Post standard tx                                                                                                                    | USA, France, UK, Spain     |
| COMBI-TED<br>NCT04884282 | II    | 105  | Tedopi + Nivo<br>Tedopi + TXT<br>TXT                         | NSCLC wout<br>EGFR/<br>ALK/ROS1               | Tedopi vaccine<br>against 5 antigenes<br>CEA, p53, HER2,<br>MAGE-2/3                                                                | Italy                      |
| NCT04278144              | I/II  | 390  | BDC-1001<br>(antiHER2 stimulating<br>Ab)<br>-/+<br>nivolumab | HER2 OE or AMP<br>solid tumours               | Post CT                                                                                                                             | USA, Korea, Spain          |
| NCT04143711              | I/II  | 490  | DF1001<br>(target NK and Tcell)+<br>nivo<br>Or PTX           | Solid tumours                                 | Dose esc HER2 OE<br>AMP or mut<br>Dose exp NSCLC<br>HER2 low/high<br>chts                                                           | USA, Europe                |

**Abbreviations:** Pt N = patient number; EGFR = Epidermal Growth Factor Receptor; HER2 = human epidermal growth factor receptor 2; Ami = amivantamab; mobo = mobocertinib; wout = without; Tx

= treatment; CT = chemotherapy; TKI(s) = Tyrosine kinase inhibitor (s); NSCLC = Non-small-cell lung cancer.

**Table S12.** Ongoing clinical trials of KRAS inhibitor-based combinations.

| Trial                       | Phase  | Pt N | Drugs                                                           | Disease                                        | Key inclusion criteria                                            | Location                                        |
|-----------------------------|--------|------|-----------------------------------------------------------------|------------------------------------------------|-------------------------------------------------------------------|-------------------------------------------------|
| CodebreaK202<br>NCT05920356 | III    | 750  | Sotorasib+ CT<br>Vs<br>Pembro + CT                              | KRASG12G<br>NSCLC                              | Tx naïve<br>PDL-1 negative                                        | Worldwide                                       |
| NCT05118854                 | II     | 27   | Sotorasib + CT                                                  | KRASG12C NSCLC                                 | Stage IIA-IIIB                                                    | USA                                             |
| NCT05180422                 | II     | 43   | Sotorasib +<br>MVASI                                            | KRASG12C NSCLC                                 | BM+<br>No prior KRAS-I                                            | USA                                             |
| NCT05054725                 | II     | 47   | Sotorasib+<br>RMC-4630<br>(SHP2-inh)                            | KRASG12C NSCLC                                 | No prior KRAS-I                                                   | Worldwide                                       |
| RAMP203<br>NCT05074810      | Ib/II  | 53   | Sotorasib +<br>Avutometinib (VS-6766)<br>(MEK-I)                | KRASG12C NSCLC                                 | Part 1 No prior KRAS-I<br>Part 2 Prior KRAS-I                     | USA                                             |
| NCT04892017                 | I/II   | 323  | DCC-3116+/-<br>Trametinib, bimetinib or<br>sotorasib            | MAPK Pathway Aberra-<br>tions<br>Solid tumours | RAS, NF1, or RAF mutations<br>No Prior RAS/RAF/MEK-I              | USA                                             |
| Argonaut<br>NCT05480865     | Ib     | 85   | Sotorasib +<br>BBP-398<br>(SHP2 inh)                            | KRASG12C<br>Solid tumours                      | Post standard tx                                                  | Australia, Spain, It-<br>aly, France            |
| NCT04720976                 | Ib     | 200  | Sotorasib +<br>JAB-3312<br>(SHP2 inh)                           | KRASG12C<br>Solid tumours                      | Several combinations:<br>For KRASG12C + sotorasib                 | USA                                             |
| NCT05374538                 | Ib     | 140  | VIC-1911<br>(aurora A inh)<br>-/+<br>sotorasib                  | KRASG12C NSCLC                                 | Cohort RAS-Is naïve<br>Cohort RAS-Is refractory                   | USA                                             |
| NCT05815173                 | Ib     | 40   | Sotorasib +<br>Ladarixin<br>(IL-8 rec Inh)                      | KRASG12C NSCLC                                 | Post ICI +/-CT<br>No prior KRAS-I                                 | USA                                             |
| Neo-kan<br>NCT05472623      | II     | 42   | Adagrasib +/-<br>nivolumab                                      | KRASG12C NSCLC                                 | stage IB-IIIA                                                     | USA                                             |
| KRYSTAL-7<br>NCT04613596    | II/III | 950  | Adagrasib +/-<br>pembrolizumab<br>Vs CT + pembro                | KRASG12C NSCLC                                 | PDL1 <50%<br>Tx naïve                                             | Worldwide                                       |
| NCT05609578                 | II     | 90   | Adagrasib +/-CT+/-<br>pembrolizumab                             | KRASG12C NSCLC                                 | Tx naïve<br>PDL1+<br>PDL1 <50%                                    | USA                                             |
| RAMP204<br>NCT05375994      | I/II   | 85   | Adagrasib +<br>Avutometinib (VS-6766)<br>(MEK-I)                | KRASG12C NSCLC                                 | Prior KRAS-I allowed                                              | USA                                             |
| KRYSTAL19<br>NCT05840510    | Ib/II  | 79   | Adagrasib +<br>Nab-sirolimus                                    | KRASG12G solid tu-<br>mours                    | Part 2 NSCLC                                                      | USA                                             |
| NCT05848843                 | I      | 44   | Adagrasib +<br>durvalumab                                       | KRASG12G NSCLC and<br>GI                       | Part 2 NSCLC and CRC<br>Prior RAS-I allowed                       | USA                                             |
| NCT05578092                 | Ib/II  | 225  | MRTX0902<br>(SO51 inh) -/+<br>adagrasib                         | MAPK alterations<br>NSCLC                      | Cohort 1 MAPK alterations<br>Cohort 2 KRAS G12C<br>No prior KRAS- | USA<br>I                                        |
| NCT06024174                 | I/II   | 410  | Adagrasib<br>BMS-986406 (anti-LILRB2<br>ab)<br>-/+<br>cetuximab | G12C solid tumours                             | Part 2 NSCLC or CRC                                               | USA, Europe,<br>Argentina,<br>Australia, Israel |
| KontRASt-01<br>NCT04699188  | I/II   | 475  | JDQ433+<br>TNO155 (SHP2-I)<br>tisilelizumab                     | KRASG12C solid tu-<br>mours                    | Prior RAS-I allowed                                               | Worldwide                                       |
| KontRASt-03<br>NCT05358249  | Ib/II  | 346  | JDQ433 + trametinib<br>JDQ433 + ribociclib                      | KRASG12C solid tu-<br>mours or NSCLC/CRC       | Part 2 NSCLC or CRC<br>Post CT and ICI                            | USA, Europe, Korea,<br>Singapore                |

| JDQ433 + cetuximab                     |      |     |                                                                                           |                         |                                                                                                               |             |
|----------------------------------------|------|-----|-------------------------------------------------------------------------------------------|-------------------------|---------------------------------------------------------------------------------------------------------------|-------------|
| KontRASt-04<br>JDQ433C12301<br>NCT TBD | III  | 380 | JDQ433+TNO155<br>Vs<br>Pembro+CT                                                          | KRASG12C NSCLC          | Tx naïve<br>PDL1 three stratification<br>PDL1<1, 1-49%; >50%                                                  | Worldwide   |
| NCT04956640                            | I    | 400 | LY3537982 in several combinations                                                         | KRASG12C solid tumours  | Post CT +ICI<br>In the cohorts plus pembro or CT tx naïve NSCLC                                               | Worldwide   |
| NCT04973163                            | I    | 29  | BI 1823911 +<br>BI 1701963<br>(SOS1 inh)<br>Midazolam<br>(PK analysis)                    | KRASG12C solid tumours  | Prior TKIs allowed                                                                                            | USA, Europa |
| NCT05288205                            | I/II | 124 | Glecirasib<br>(JAB-21822) +<br>JAB-3312<br>(SHP2 inhibitor)                               | solid tumours           | Post standard care<br>KRASG12C+ preferred                                                                     | China       |
| NCT05379946                            | I/II | 92  | D-1553 +<br>IN10018<br>(FAK inh)                                                          | KRAS G12C solid tumours | -                                                                                                             | China       |
| MK-1084-001<br>NCT05067283             | I    | 450 | MK-1084 +<br>Several combinations<br>Pembrolizumab<br>Cetuximab<br>CT according to tumour | KRAS G12C solid tumours | Arm2 (pembro)<br>tx naïve KRASG12C /PDL1 +<br>NSCLC<br>Arm 4 (pembro +CT)<br>tx naïve KRASG12C nonsq<br>NSCLC | Worldwide   |

**Abbreviations:** Pt N = patient number; vs = versus; NSCLC = non-small-cell lung cancer; KRAS-I(s) = KRAS inhibitors; Tx = treatment; inh = inhibitory; CRC = colon rectal cancer; nonsq = Non squamous; CT = chemotherapy; ICI = immune-checkpoint inhibitor; PD-L1 = Programmed Cell Death Ligand 1; CRT = chemo-radiotherapy; BM = brain metastases; MVASI = bevacizumab biosimilar; TKI = tyrosine kinase inhibitor; MAPK = Mitogen-activated protein kinase.

**Table S13.** ICI-TKI based combinations in BRAF mutated NSCLC patients.

| Trial                      | Phase  | Pt N | Drugs                                       | Disease                                      | Key inclusion criteria                                                                                                                                                      | Location  |
|----------------------------|--------|------|---------------------------------------------|----------------------------------------------|-----------------------------------------------------------------------------------------------------------------------------------------------------------------------------|-----------|
| NCT03600701                | Ib/II  | 48   | Atezolizumab + cobimetinib                  | NSCLC                                        | Cohort 1 KRAS+<br>Cohort 2 No KRAS+ refractory to ICI                                                                                                                       | USA       |
| BFAST<br>NCT03178552       | II/III | 1000 | Vemurafenib<br>Cobimetinib<br>atezolizumab  | cfDNA BRAFV600E                              | A: ALK alectinib<br>B RET alectinib<br>C bTMB atezolizumab vs CT<br>D ROS1 entrectinib<br>E BRAFV600E<br>F EGFRx20ins<br>CT + beva + atezo<br>G KRASG12C<br>GDC-6036 or TXT | Worldwide |
| IM-BATTLE-2<br>NCT03225664 | Ib/II  | 37   | Pembrolizumab + trametinib                  | NSCLC w/wout EGFR/ALK/ROS1                   | Refractory to ICI and TKI if gene-addicted NSCLC                                                                                                                            | USA       |
| NCT05988697                | II     | 36   | Aspirin + dabrafenib+ trametinib            | BRAFV600E tx naïve                           | No prior tx including BRAF/MEK-I                                                                                                                                            | China     |
| NCT05641493                | Ib/II  | 49   | HLX208+<br>Serplulimab (HLX10)<br>Anti-PD-1 | BRAFV600E<br>Solid tumours and NSCLC (ph II) | No prior BRAF/MEK-I                                                                                                                                                         | China     |
| NCT04777175                | Obs    | 186  | ICI                                         | KRAS, BRAF, HER2, MET, ALK, RET              | Retrospective study                                                                                                                                                         | China     |

**Abbreviations:** Pt N = patient number; obs.= observational; NSCLC = non-small-cell lung cancer; KRAS = Ki-ras2 Kirsten rat sarcoma viral oncogene homolog; BRAF = v-raf murine sarcoma viral oncogene homolog B1 KRAS-I(s) = KRAS inhibitors; Tx = treatment; cfDNA circulating free DNA; ICI = immunecheckpoint inhibitor; w = with; wout = without; Tx = treatment naïve; atezo = atezolizumab.

**Table S14.** Ongoing clinical trials of TKI-based combination in MET dysregulated NSCLC patients.

| Trial                    | Phase | Pt N | Drugs                           | Disease                          | Key inclusion criteria                                                                                                  | Location           |
|--------------------------|-------|------|---------------------------------|----------------------------------|-------------------------------------------------------------------------------------------------------------------------|--------------------|
| METalmark<br>NCT05488314 | Ib/II | 161  | Capmatinib plus<br>amivantamab  | MET+ NSCLC                       | Cohort 1A tx naïve METex14<br>NSCLC<br>Cohort 1B pretreated<br>METex14 NSCLC<br>Cohort 1C pretreated MET<br>AMP NSCLC   | USA, Turkey, Korea |
| NCT05435846              | Ib    | 33   | Capmatinib plus<br>trametinib   | METex14 NSCLC                    | METex14 on lx or tissue<br>Refractory to prior MET-I<br>Note MET-I is not mandatory<br>to be the last line of treatment | USA                |
| POTENT<br>NCT05782361    | Ib    | 38   | Tepotinib plus<br>pembrolizumab | NSCLC with or without<br>METex14 | METex14 on lx or tissue<br>Part A Tx Naïve or ICI refrac-<br>tory<br>Part B tx naïve METex14                            | UK                 |
| SOUND<br>NCT05374603     | II    | 60   | Savolitinib plus<br>durvalumab  | MET+ NSCLC                       | MET OE, MET AMP or<br>METex14<br>No prior MET-I or ICI                                                                  | China              |
| NCT05777278              | I/II  | 29   | Savolitinib plus<br>docetaxel   | MET OE NSCLC                     | Second line setting<br>MET OE<br>(3+ in ≥50% of TC)                                                                     | China              |

**Abbreviations** = pt N = patient number; Lx = liquid biopsy; MET+ = MET dysregulated; MET OE = MET overexpression; METex14 = MET exon 14 skipping mutations; MET AMP = MET amplification; TC = tumor cells; Tx Naïve= treatment naïve; ICI = immune checkpoint inhibitors; MET-I(s) = MET inhibitor(s); NSCLC = Non-small-cell lung cancer.

**Table S15.** Ongoing clinical trials of TKI-based in ALK+ or ROS1+ NSCLC patients.

| Trial                       | Phase | Pt N | Drugs                                   | Disease                           | Key inclusion Criteria      | Location                |
|-----------------------------|-------|------|-----------------------------------------|-----------------------------------|-----------------------------|-------------------------|
| <b>ALK-I based combo</b>    |       |      |                                         |                                   |                             |                         |
| NCT04356118                 | IV    | 30   | RH endostatin+ intratecal MTX<br>+ ALKI | NSCLC                             | LMC+                        | China                   |
| MASTER ALK<br>NCT05200481   | RPII  | 110  | Brigatinib +/- CT                       | ALK+<br>NSCLC                     | Tx naïve                    | France                  |
| NCT05491811                 | II    | 77   | Ensartinib + bevacizumab                | ALK+<br>NSCLC                     | Tx naïve<br>p53+            | China                   |
| NCT03202940                 | Ib/II | 31   | Alectinib + cobimetinib                 | ALK+<br>NSCLC                     | Post-alectinib              | USA                     |
| <b>Other Combo</b>          |       |      |                                         |                                   |                             |                         |
| HARMONIC<br>NCT05456256     | II    | 90   | LP-300 + CT                             | Gene-addicted<br>NSCLC            | Post standard tx            | USA                     |
| NCT05266846                 | II    | 30   | Pembrolizumab+ bevacizumab + CT         | ALK+<br>NSCLC                     | Post alectinib              | China                   |
| NCT03991403                 | RPIII | 228  | CT + bevacizumab + atezolizumab         | EGFR+ or ALK+<br>NSCLC            | Post TKIs                   | Korea<br>Not recruiting |
| GFPC 06-2018<br>NCT04042558 | II    | 149  | CT + atezolizumab+/- bevacizumab        | EGFR+ or ALK+<br>ROS1+<br>NSCLC   | Post TKIs                   | France                  |
| NCT04425135                 | II    | 59   | CT+ camrelizumab+ apatinib              | ALK+ NSCLC                        | Post ALK-Is                 | China                   |
| NCT04989322                 | II    | 46   | Pembrolizumab + Lenvatinib + CT         | EGFR+ or ALK+<br>ROS1+<br>NSCLC   | Post TKIs                   | Hong Kong               |
| NCT05296278                 | II    | 80   | IBI-322 + Lenvatinib + CT               | ALK+ NSCLC                        | Post alectinib              | China                   |
| NCT04777084                 | Ib    | 100  | IBI-318+ Lenvatinib                     | NSCLC with or<br>without EGFR/ALK | Post ICI<br>Post TKIs       | China                   |
| NCT05681780                 | I/II  | 20   | CD40L-Augmented TIL                     | EGFR, ALK, ROS1<br>or HER2 NSCLC  | Post TKIs or standard<br>tx | USA                     |
| PIKACHU                     | Obs.  | 100  | Anti-PD1 plus CT                        | ALK+ ROS1+                        | Post TKIs                   | China                   |

|                          |      |     |                              |                                 |                                                          |                       |
|--------------------------|------|-----|------------------------------|---------------------------------|----------------------------------------------------------|-----------------------|
| NCT04322890              |      |     |                              | NSCLC                           |                                                          |                       |
| NCT05195619              | I    | 16  | DC vaccines                  | NSCLC                           | Non-gene addicted NSCLC<br>Or EGFR/ALK or ROS-1 post TKI | Switzerland           |
| SNK_ASTER<br>NCT04872634 | I/II | 24  | SNK01 NK + CT + /-cetuximab  | EGFR+ or ALK+<br>ROS1+<br>NSCLC | Post-TKIs                                                | Korea                 |
| NCT04880863              | II   | 35  | NAP+ Docetaxel+ Obinutuzumab | NSCLC                           | NSCLC post ICI<br>Gene addicted NSCLC<br>post TKIs       | USA<br>Not recruiting |
| NCT03645928              | II   | 178 | Autologous TILs              | Solid tumours                   | NSCLC post ICI<br>Gene addicted NSCLC<br>post TKIs       | USA, Europe           |

**Abbreviations:** LMC = leptomeningeal carcinomatosis; ALK = Anaplastic Lymphoma Kinase; EGFR = Epidermal Growth Factor Receptor; ROS1 = c-ros oncogene 1; ALK-I(s) = ALK inhibitor(s); TKIs = tyrosine kinase inhibitor(s); MTX = methotrexate; CT = chemotherapy; PD1 = programmed death-1; DC vaccine = dendritic cell vaccine; TILs = tumor-infiltrating lymphocytes ICI = immune checkpoint inhibitor; Tx = treatment; NSCLC = Non-small-cell-lung cancer.

**Table S16.** Ongoing combinations in RET+ NSCLC.

| Trial                   | Phase | Pt N | Drugs              | Disease                | Key inclusion Criteria                                | Location |
|-------------------------|-------|------|--------------------|------------------------|-------------------------------------------------------|----------|
| LungMAP<br>NCT05364645  | II    | 74   | Selpercatinib + CT | RET+ NSCLC             | Progressing on RET-I<br>as the most recent tx<br>line | USA      |
| NCT05845671             | I/II  | 12   | Amivantamab + TKIs | Gene addicted<br>NSCLC | ALK+, ROS1+, or RET+<br>Post at least one TKI         | USA      |
| <b>Without TKI</b>      |       |      |                    |                        |                                                       |          |
| POSEIDON<br>NCT04322591 | Obs   | 70   | CT vs CT+ ICI      | RET+ NSCLC             | Tx naïve<br>RET fusion+                               | China    |

Abbreviations Pt N = patient number; TKIs = tyrosine kinase inhibitors; NSCLC = Non-Small-Cell lung cancer; RET = rearranged during transfection; RET-I = RET inhibitors; tx = treatment; CT chemotherapy; ICI = immunosuppression.

## References

1. Zhou C, Ramalingam SS, Kim TM, et al: Treatment Outcomes and Safety of Mobocertinib in Platinum-Pretreated Patients With EGFR Exon 20 Insertion-Positive Metastatic Non-Small Cell Lung Cancer: A Phase 1/2 Open-label Nonrandomized Clinical Trial. *JAMA Oncol* 7:e214761, 2021
2. Le X, Goldman JW, Clarke JM, et al: Poziotinib shows activity and durability of responses in subgroups of previously treated EGFR exon 20 NSCLC patients. *Journal of Clinical Oncology* 38:9514-9514, 2020
3. Yu HA, Tan DS-W, Smit EF, et al: Phase (Ph) 1/2a study of CLN-081 in patients (pts) with NSCLC with EGFR exon 20 insertion mutations (Ins20). *Journal of Clinical Oncology* 40:9007-9007, 2022
4. Wang M, Yang JC, Mitchell PL, et al: Sunvozertinib, a Selective EGFR Inhibitor for Previously Treated Non-Small Cell Lung Cancer with EGFR Exon 20 Insertion Mutations. *Cancer Discov* 12:1676-1689, 2022
5. Han B, Zhou C, Wu L, et al: 1210P Preclinical and preliminary clinical investigations of furmonertinib in NSCLC with EGFR exon 20 insertions (20ins). *Annals of Oncology* 32:S964, 2021
6. Robichaux JP, Elamin YY, Tan Z, et al: Mechanisms and clinical activity of an EGFR and HER2 exon 20-selective kinase inhibitor in non-small cell lung cancer. *Nat Med* 24:638-646, 2018
7. Le X, Cornelissen R, Garassino M, et al: Poziotinib in Non-Small-Cell Lung Cancer Harboring HER2 Exon 20 Insertion Mutations After Prior Therapies: ZENITH20-2 Trial. *J Clin Oncol* 40:710-718, 2022

- 
8. Liu SV, Villaruz LC, Lee VHF, et al: LBA61 First analysis of RAIN-701: Study of tarloxotinib in patients with non-small cell lung cancer (NSCLC) EGFR Exon 20 insertion, HER2-activating mutations & other solid tumours with NRG1/ERBB gene fusions. *Annals of Oncology* 31:S1189, 2020
  9. Zhou C, Li X, Wang Q, et al: Pyrotinib in HER2-Mutant Advanced Lung Adenocarcinoma After Platinum-Based Chemotherapy: A Multicenter, Open-Label, Single-Arm, Phase II Study. *J Clin Oncol* 38:2753-2761, 2020
  10. Oguchi K, Araki H, Tsuji S, et al: TAS2940, a novel brain-penetrable pan-ERBB inhibitor, for tumors with HER2 and EGFR aberrations. *Cancer Sci* 114:654-664, 2023
